# Supplementary material for: Cytotoxic and Transcriptomic Effects in Avian Hepatocytes Exposed to a Complex Mixture from Air Samples, and Their Relation to the Organic Flame Retardant Signature
Source: MDPI journal article supplement (doi:10.3390/toxics9120324), 2021-11-30
Supplement: s1 [file s1]

# Supplementary Materials: Cytotoxic and Transcriptomic Effects in Avian Hepatocytes Exposed to a Complex Mixture from Air Samples, and Their Relation to the Organic Flame Retardant Signature

Kelsey Ha, Pu Xia, Doug Crump, Amandeep Saini, Tom Harner and Jason O'Brien

**Table S1.** List of sampling location information including sampling dates for period 2 (start and retrieval), exposure time, total population, density of the cities, gross domestic product (GDP) and human development index (HDI). These data were provided by Saini et al. 2020 [1].

| Location                | Latitude | Longitude | Start Date | Retrieval Date | Exposure Time (days) | Population <sup>1</sup> (million) | Pop Density <sup>1</sup> (per sq km) | GDP <sup>2</sup> (billion USD) PPP Adjusted | HDI <sup>3</sup> |
|-------------------------|----------|-----------|------------|----------------|----------------------|-----------------------------------|--------------------------------------|---------------------------------------------|------------------|
| Bangkok, Thailand       | 13.7235  | 100.5216  | 28-Mar-18  | 27-Jun-18      | 91                   | 8.3/14.6                          | 5300                                 | 306.8                                       | 0.755            |
| Beijing, China          | 39.9042  | 116.4074  | 02-Jul-18  | 01-Oct-18      | 91                   | 21.5/24                           | 1300                                 | 506                                         | 0.887            |
| Cairo, Egypt            | 30.0141  | 31.4860   | 02-Jul-18  | 02-Oct-18      | 92                   | 12/20.5                           | 19,376                               | 102.2                                       | 0.743            |
| São Paulo, Brazil       | −23.6183 | −46.6355  | 02-Jul-18  | 02-Oct-18      | 92                   | 12.2/21.5                         | 7216                                 | 430.5                                       | 0.826            |
| Mexico city, Mexico     | 19.2465  | −99.1013  | 02-Jul-18  | 02-Oct-18      | 92                   | 8.9/21.2                          | 6000                                 | 403.6                                       | 0.83             |
| Madrid, Spain           | 40.4432  | −3.6846   | 02-Jul-18  | 02-Oct-18      | 92                   | 3.3/6.5                           | 5400                                 | 262.3                                       | 0.925            |
| Sydney, Australia       | −33.7962 | 151.1449  | 03-Jul-18  | 03-Oct-18      | 92                   | 5.5*                              | 400*                                 | 223.4                                       | 0.94             |
| Lagos, Nigeria          | 6.5244   | 3.3792    | 30-Jun-18  | 30-Sep-18      | 92                   | 13/21                             | 6871                                 | 33.6                                        | 0.652            |
| Bogota, Colombia        | 4.6368   | −75.0834  | 29-Jun-18  | 03-Oct-18      | 96                   | 8.1/11.5                          | 4310                                 | 159.9                                       | 0.794            |
| Warsaw, Poland          | 52.2216  | 21.0073   | 03-Jul-18  | 28-Sep-18      | 87                   | 1.8                               | 3372                                 | 141.1                                       | 0.865            |
| Tokyo, Japan            | 35.6895  | 139.6917  | 09-Jul-18  | 01-Oct-18      | 84                   | 9.3/13.5                          | 6158                                 | 1617                                        | 0.936            |
| Toronto, Canada         | 43.6590  | −79.3956  | 03-Jul-18  | 03-Oct-18      | 92                   | 2.8/5.9                           | 4150                                 | 276.3                                       | 0.926            |
| Istanbul, Turkey        | 41.0082  | 28.9784   | 12-Apr-18  | 12-Jul-18      | 91                   | 15                                | 2523                                 | 348.7                                       | 0.812            |
| London, UK              | 51.4960  | −0.1270   | 12-Jul-18  | 08-Oct-18      | 88                   | 8.7/14                            | 5600                                 | 835.7                                       | 0.965            |
| New York, USA           | 40.7301  | −73.9989  | 01-Jul-18  | 13-Nov-18      | 135                  | 8.6                               | 10,715                               | 1403                                        | 0.946            |
| Kolkata, India          | 22.5726  | 88.3639   | 08-Jul-18  | 22-Oct-18      | 106                  | 4.6/14.7                          | 2,4000                               | 60.4                                        | 0.637            |
| Santiago, Chile         | −34.5581 | −58.4867  | 01-Mar-19  | 13-Jun-19      | 104                  | 6.5                               | 9821                                 | 171.4                                       | 0.874            |
| New Delhi, India        | 28.5897  | 77.2257   | 25-Feb-19  | 17-May-19      | 81                   | 16.3/29.4                         | 11,300                               | 293.6                                       | 0.744            |
| Buenos Aires, Argentina | −33.4378 | 70.6504   | 17-Jan-19  | 28-Feb-19      | 42                   | 2.89/13.5                         | 13,680                               | 315.9                                       | 0.885            |

<sup>1</sup>: Total population and population density data: <http://worldpopulationreview.com/world-cities/>. The cities for which two values of total population is given, the first value represents the population of urban agglomeration (main urban core) and the 2nd value includes the population of the metro area that includes densely populated urban core as well as surrounding territories.<sup>2</sup>: GDP data: GDP by metropolitan area- <https://www.bea.gov/data/gdp/gdp-metropolitan-area>. Note that GDP data given here is purchasing power parity (PPP) adjusted for which rates of a currency conversion are applied to eliminate the differences in price levels between different countries' currencies.<sup>3</sup>: HDI: Unites Nations Development Programme - Human Development Index Trends. <http://hdr.undp.org/en>. \* <http://www.population.net.au/sydney-population/>.

**Table S2.** List of target analytes, standards and their abbreviations

| Chemical                           | Abbreviation (alternate abbr.) |
|------------------------------------|--------------------------------|
| 2,2',4-Tribromodiphenyl ether      | BDE-17                         |
| 2,4,4'-Tribromodiphenyl ether      | BDE-28                         |
| 2,2',4,4'-Tetrabromodiphenyl ether | BDE-47                         |

|                                              |                                 |
|----------------------------------------------|---------------------------------|
| 2,3',4,4'-Tetrabromodiphenyl ether           | BDE-66                          |
| 2,3',4',6-Tetrabromodiphenyl ether           | BDE-71                          |
| 2,2',3,4,4'-Pentabromodiphenyl ether         | BDE-85                          |
| 2,2',4,4',5-Pentabromodiphenyl ether         | BDE-99                          |
| 2,2',4,4',6-pentabromodiphenyl ether         | BDE-100                         |
| 2,2',3,4,4',5'-hexabromodiphenyl ether       | BDE-138                         |
| 2,2',4,4',5,5'-hexabromodiphenyl ether       | BDE-153                         |
| 2,2',4,4',5,6'-hexabromodiphenyl ether       | BDE-154                         |
| 2,2',3,4,4',5,6-heptabromodiphenyl ether     | BDE-183                         |
| 2,3,3',4,4',5,6-heptabromodiphenyl ether     | BDE-190                         |
| Decabromodiphenyl ether                      | BDE-209                         |
| Ally-2,4,6-tribromophenyl ether              | TBP-AE (ATE)                    |
| Beta tetrabromoethylcyclohexane              | $\beta$ -DBE-DBCH (TBECH)       |
| Pentabromobenzene                            | PBBZ                            |
| Pentabromoethylbenzene                       | PBEB                            |
| Pentabromotoulene                            | PBT                             |
| 2-bromoallyl-2,4,6-tribromophenyl ether      | BATE                            |
| Beta 1,2,5,6 tetrabromocyclooctane           | $\beta$ -TBCO                   |
| 2,3-dibromopropyl-2,4,6-tribromophenyl ether | TBP-DBPE (DPTE)                 |
| Hexabromobenzene                             | HBB                             |
| Dechlorane 602                               | Dec-602                         |
| 2-ethylhexyl-2,3,4,5-tetrabromobenzoate      | EH-TBB (TBB)                    |
| Dechlorane 604                               | Dec-604                         |
| 1,2-bis(2,4,6-tribromophenoxy)ethane         | BTBPE                           |
| Bis(2-ethyl-1-hexyl)tetrabromophthalate      | BEHTEBP (TBPH)                  |
| Syn- and anti-Dechlorane plus                | <i>syn</i> -DP, <i>anti</i> -DP |
| Octabromotrimethylphenylindane               | OBTMPI (OBIND)                  |
| Decabromodiphenyl ethane                     | DBDPE                           |
| Tetrabromobisphenol-A                        | TBBPA                           |
| $\alpha$ -Hexabromocyclododecane             | $\alpha$ -HBCDD                 |
| $\beta$ -Hexabromocyclododecane              | $\beta$ -HBCDD                  |
| $\gamma$ -Hexabromocyclododecane             | $\gamma$ -HBCDD                 |
| Tri-methyl phosphate                         | TMP                             |
| Tri-ethyl phosphate                          | TEP                             |
| Tri-n-propyl phosphate                       | TPP (TPrP)                      |
| Tri-n-butyl phosphate                        | TNBP                            |
| Tris (2-chloroethyl) phosphate               | TCEP                            |
| Tris (chloroisopropyl) phosphate             | TCIPP                           |
| Tri-phenyl phosphate                         | TPHP                            |
| 2-ethylhexyl diphenyl phosphate              | EHDPP                           |
| Tri- <i>m</i> -tolyl phosphate               | m-TMPP (m-TTP)                  |
| Tri- <i>p</i> -tolyl phosphate               | p-TMPP (p-TTP)                  |

|                                                                            |                                    |
|----------------------------------------------------------------------------|------------------------------------|
| Tri- <i>o</i> -tolyl phosphate                                             | <i>o</i> -TMPP ( <i>o</i> -TTP)    |
| Tris (2-butoxyethyl) phosphate                                             | TBOEP                              |
| Tris(3,5-dimethylphenyl) phosphate                                         | T35DMPP                            |
| Tris (1,3-dichloro-2-propyl) phosphate                                     | TDCIPP (TDCIPP)                    |
| Tris (2-ethyl hexyl) phosphate                                             | TEHP                               |
| Tris (2-isopropylphenyl) phosphate                                         | TIPPP (T2IPPP)                     |
| Tris (tribromo neopentyl) phosphate                                        | TTBPP                              |
| Tris (2,3-dibromopropyl) phosphate                                         | TDBPP                              |
| <i>d</i> <sub>15</sub> tri-ethyl phosphate                                 | <i>d</i> <sub>15</sub> TEP         |
| <i>d</i> <sub>21</sub> tri- <i>n</i> -propyl phosphate                     | <i>d</i> <sub>21</sub> TPP         |
| <i>d</i> <sub>27</sub> tri-butyl phosphate                                 | <i>d</i> <sub>27</sub> TNBP        |
| <i>d</i> <sub>12</sub> tris (2-chloroethyl) phosphate                      | <i>d</i> <sub>12</sub> TCEP        |
| <sup>13</sup> C <sub>18</sub> tri-phenyl phosphate                         | <sup>13</sup> C <sub>18</sub> TPHP |
| <sup>13</sup> C <sub>6</sub> tris (2-butoxyethyl) phosphate                | <sup>13</sup> C <sub>6</sub> TBOEP |
| <i>d</i> <sub>15</sub> tris (1,3-dichloro-2-propyl) phosphate              | <i>d</i> <sub>15</sub> TDCIPP      |
| <i>d</i> <sub>15</sub> tri-phenyl phosphate                                | <i>d</i> <sub>15</sub> TPHP        |
| <i>Mirex</i>                                                               | <i>Mirex</i>                       |
| 2,4,4',6-Tetrabromodiphenyl ether                                          | BDE-75                             |
| 2,2',4,4'-Tetrabromo[ <sup>13</sup> C <sub>12</sub> ]diphenyl ether        | MBDE-47                            |
| 2,2',3,4,4',6-hexabromo[ <sup>13</sup> C <sub>12</sub> ]diphenyl ether     | MBDE-139                           |
| 2,2',3,4,4',5,5'-heptabromo[ <sup>13</sup> C <sub>12</sub> ]diphenyl ether | MBDE-180                           |
| Decabromo[ <sup>13</sup> C <sub>12</sub> ]diphenyl ether                   | MBDE-209                           |
| Pentabromo[ <sup>13</sup> C <sub>6</sub> ]benzene                          | MPBBZ                              |
| Cl10 Dechlorane plus                                                       | aCIDP                              |
| α-Hexabromo[ <sup>13</sup> C <sub>12</sub> ]cyclododecane                  | Mα-HBCDD                           |
| β-Hexabromo[ <sup>13</sup> C <sub>12</sub> ]cyclododecane                  | Mβ-HBCDD                           |
| γ-Hexabromo[ <sup>13</sup> C <sub>12</sub> ]cyclododecane                  | Mγ-HBCDD                           |
| γ-Hexabromocyclododecane- <i>d</i> 18                                      | Dγ-HBCDD                           |
| Tetrabromo[ <sup>13</sup> C <sub>12</sub> ]bisphenol-A                     | MTBBPA                             |

Internal standards are listed in italicized font.

**Table S3.** List of genes included on the Avian ToxChip PCR array and their related functions.

| Genes   | Description                                           | Function              |
|---------|-------------------------------------------------------|-----------------------|
| CYP3A37 | Cytochrome P450 A 37                                  | Xenobiotic metabolism |
| CYP1A4  | Cytochrome P450 1A4                                   |                       |
| UGT1A9  | UDP glucuronosyltransferase 1 family, polypeptide A9  |                       |
| SULT1B1 | Sulfotransferase family, cytosolic, 1B, member 1      |                       |
| NAT     | N-acetyltransferase, liver isozyme                    |                       |
| AOC1    | Amine oxidase, copper containing 1                    |                       |
| MAT1A   | Methionine adenosyltransferase I, alpha               |                       |
| BATF3   | Basic leucine zipper transcription factor, ATF-like 3 |                       |
| IL16    | Interleukin 16 (lymphocyte chemoattractant factor)    |                       |
| IL1B    | Interleukin 1 Beta                                    | Immune function       |
| NOS2    | Nitric oxide synthase 2, inducible                    |                       |
| LEAP2   | Liver expressed antimicrobial peptide 2               |                       |
| FGA     | Fibrinogen alpha chain                                |                       |

|         |                                                             |                                   |
|---------|-------------------------------------------------------------|-----------------------------------|
| SULT1E1 | Sulfotransferase family 1E, estrogen-preferring member1     | Hormone regulation & metabolism   |
| TXN     | Thioredoxin                                                 |                                   |
| CA3B    | Carbonic anhydrase III-like (LOC420209)                     | Oxidative stress & inflammation   |
| MGST3   | Microsomal glutathione S-transferase 3                      |                                   |
| MT4     | Metallothionein 4                                           |                                   |
| ACSL5   | Acyl-CoA synthetase long-chain family member 5              |                                   |
| FGF19   | Fibroblast growth factor 19                                 |                                   |
| CYP7B1  | Cytochrome P450, family 7, subfamily B, polypeptide 1       |                                   |
| SCD     | Stearoyl-CoA desaturase (delta-9-desaturase)                |                                   |
| LSS     | Lanosterol synthase (2,3-oxidosqualene-lanosterol cyclase)  | Lipid homeostasis                 |
| ALDH1A1 | Aldehyde dehydrogenase 1 family, member A1                  |                                   |
| APOB    | Apolipoprotein B                                            |                                   |
| LBFABP  | Fatty acid binding protein 1, liver                         |                                   |
| SLCO1A2 | Solute carrier organic anion transporter family, member 1A2 |                                   |
| TTR     | Transthyretin                                               |                                   |
| THrsp   | Thyroid hormone responsive (SPOT14 homolog, rat)            | Thyroid Hormone pathway           |
| IGF1    | Insulin-like growth factor 1 (somatomedin C)                |                                   |
| PDK4    | Pyruvate dehydrogenase kinase, isozyme 4                    | Glucose and fatty acid metabolism |
| G6PC    | Glucose-6-phosphatase catalytic subunit (LOC100857298)      |                                   |
| HMOX1   | Heme oxygenase 1                                            | Heme homeostasis                  |
| ALAS1   | Aminolevulinate, delta, synthase1                           |                                   |
| CDKN1A  | Cdk inhibitor CIP1 (p21)                                    |                                   |
| GADD45A | Growth arrest and DNA-damage-inducible, alpha               |                                   |
| MGMT    | O-6-methylguanine-DNA methyltransferase                     |                                   |
| TP63    | Tumor protein p63                                           | DNA Damage & Repair               |
| MSH2    | MutS homolog 2, colon cancer, nonpolyposis type 1 (E. coli) |                                   |
| POLB    | Polymerase (DNA directed), beta                             |                                   |
| POLK    | Polymerase (DNA directed) kappa                             |                                   |
| FOXA1   | Forkhead box A1                                             | Transcriptional regulation        |
| CRYAB   | Crystallin, alpha B                                         | Molecular chaperone               |
| EEF1A1  | Eukaryotic translation elongation factor 1 alpha 1          |                                   |
| RPL4    | Ribosomal protein L4                                        |                                   |
| GGDC    | Chicken Genomic DNA Contamination                           | Control genes                     |
| RTC     | Reverse Transcription Control                               |                                   |
| PPC     | Positive PCR Control                                        |                                   |

**Table S4.** Total concentrations (pg/mL) of organic flame retardants (OFRs), including organophosphate esters (OPEs), polybrominated diphenyl ethers (PBDEs), novel flame retardants (NFRs), hexabromocyclododecanes (HBCDDs) and tetrabromobisphenol A (TBBPA) measured in passive air samplers collected from 19 major cities. The cities are listed in decreasing order based on their total OFR concentrations. Location names are colored based on the United Nations regional groups: Africa (red); Asia-Pacific (green); WEOG = Western Europe and Other states Group (purple); GRULAC = Group of Latin American and the Caribbean (blue); CEE = Central and Eastern Europe (orange).

| Location Name           | Total OFRs | $\Sigma_{10}$ OPEs | $\Sigma_9$ PBDEs | $\Sigma_{11}$ NFRs | $\Sigma$ HBCDDs/TBBPA |
|-------------------------|------------|--------------------|------------------|--------------------|-----------------------|
| London, UK              | 4,605,588  | 4,564,993          | 31,638           | 7408               | 1550                  |
| New York, USA           | 3,291,515  | 3,223,693          | 26,082           | 34,740             | 7000                  |
| Tokyo, Japan            | 1,10,6043  | 1,028,493          | 19,299           | 15,351             | 42,900                |
| Beijing, China          | 877,733    | 825,593            | 20,092           | 8523               | 23,525                |
| Lagos, Nigeria          | 747,208    | 647,493            | 46,993           | 41572              | 11,150                |
| Sao Paulo, Brazil       | 682,286    | 666,193            | 6650             | 8343               | 1100                  |
| Toronto, Canada         | 65,2355    | 622,493            | 12,967           | 12,770             | 4125                  |
| Bogota, Columbia        | 473,193    | 454,893            | 4030             | 13,469             | 800                   |
| Bangkok, Thailand       | 458,288    | 412,493            | 23,600           | 21,321             | 875                   |
| Warsaw, Poland          | 388,107    | 381,193            | 3048             | 3292               | 575                   |
| Santiago, Chile         | 322,877    | 306,565            | 5039             | 11,073             | 200                   |
| Mexico City, Mexico     | 303,891    | 258,393            | 12,654           | 32,269             | 575                   |
| Sydney, Australia       | 302,907    | 295,993            | 1722             | 3392               | 1800                  |
| Madrid, Spain           | 297,909    | 281,593            | 8022             | 8294               | ND                    |
| Istanbul, Turkey        | 249,617    | 227,380            | 5134             | 1877               | 15,225                |
| Cairo, Egypt            | 188,046    | 158,265            | 16,784           | 11,497             | 1500                  |
| New Delhi, India        | 150,264    | 127,793            | 8143             | 6629               | 7700                  |
| Buenos Aires, Argentina | 88,827     | 83,693             | 2436             | 2698               | 0                     |
| Kolkata, India          | 85,481     | 75,836             | 3657             | 5689               | 300                   |

**Table S5.** Raw luminescence cell viability data from CEH dosed with varying concentrations of passive air sampler extracts. Signals were obtained using the ViaLight plus kit and luminescence was read with a 1 s integrated reading time using a luminometer.

| Sample Labels | DMSO  | 0.01  | 0.1   | 1     |
|---------------|-------|-------|-------|-------|
| WE01          | 14.38 | 16.12 | 10.95 | 4.236 |
| WE01          | 14.38 | 15.05 | 12.44 | 3.85  |
| WE02          | 14.38 | 17.16 | 15.9  | 14.21 |
| WE02          | 14.38 | 14.53 | 17.19 | 15.5  |
| WE03          | 14.38 | 17.87 | 17.25 | 9.64  |
| WE03          | 14.38 | 18.45 | 17.08 | 10.12 |
| WE05          | 14.38 | 16.61 | 18.08 | 7.095 |
| WE05          | 14.38 | 17.75 | 15.34 | 5.116 |
| WE06          | 14.38 | 18.4  | 11.93 | 4.299 |
| WE06          | 14.38 | 18.6  | 17.38 | 5.082 |
| GR01          | 14.38 | 18.31 | 18.99 | 2.755 |
| GR01          | 14.38 | 18.38 | 19.15 | 3.518 |
| GR02          | 14.38 | 20.24 | 19.35 | 2.812 |
| GR02          | 14.38 | 18.71 | 19.69 | 1.583 |
| GR03          | 14.89 | 13.15 | 11.08 | 7.361 |
| GR03          | 14.89 | 14.7  | 10.35 | 5.027 |
| GR04          | 14.89 | 13.5  | 12.74 | 2.813 |
| GR04          | 14.89 | 14.34 | 12.87 | 2.239 |
| GR05          | 14.89 | 15.87 | 15.51 | 17.92 |
| GR05          | 14.89 | 17.13 | 16.33 | 14.66 |
| AS01          | 14.89 | 15.16 | 15.48 | 8.301 |
| AS01          | 14.89 | 16.19 | 17    | 7.15  |
| AS02          | 14.89 | 17.15 | 12.6  | 4.263 |
| AS02          | 14.89 | 16.42 | 17.41 | 3.641 |
| AS04          | 14.89 | 16.88 | 16.5  | 5.639 |
| AS04          | 14.89 | 17.91 | 18.3  | 4.265 |
| AS05          | 14.89 | 16.96 | 15.46 | 4.51  |
| AS05          | 14.89 | 18.71 | 17.61 | 4.093 |
| AF01          | 14.89 | 13.45 | 20.9  | 6.7   |
| AF01          | 14.89 | 16.81 | 17.15 | 6.267 |
| AF02          | 14.89 | 17.53 | 23.36 | 3.322 |
| AF02          | 14.89 | 18.67 | 22.52 | 3.634 |
| CEE01         | 14.89 | 15.41 | 19.27 | 3.475 |
| CEE01         | 14.89 | 17.28 | 17.84 | 3.639 |

**Table S6.** The ranks of chemicals that contributed to partial least square (PLS) regression modeling for estimating cytotoxicity values (LC50).

| Chemicals | Coefficient Values Contributed to PLS Modeling | Ranks |
|-----------|------------------------------------------------|-------|
| PBEB      | 0.30                                           | 1     |
| BDE-154   | 0.25                                           | 2     |
| BDE-85    | 0.24                                           | 3     |
| syn-DP    | 0.23                                           | 4     |
| TEP       | 0.20                                           | 5     |
| TDCPP     | 0.19                                           | 6     |
| DPTE      | 0.13                                           | 7     |
| anti-DP   | 0.02                                           | 8     |
| BDE-100   | 0.01                                           | 9     |

**Table S7.** Raw cycle threshold (Ct) data derived from the Chicken ToxChip PCR array for 43 target genes and four control genes in chicken embryonic hepatocytes exposed to the DMSO vehicle control (A) or a dilution factor of 0.1 from the “neat” air sampler extract from Bangkok, Thailand (B). Average Ct values ( $\pm$  standard deviation) are included ( $n = 3$  replicate wells/treatment group).

| <b>A</b> |      |                |       |       |       |      |
|----------|------|----------------|-------|-------|-------|------|
| Symbol   | Well | Control Sample |       |       | AVG   | SD   |
|          |      | exp1           | exp2  | exp3  |       |      |
| CYP3A7   | A01  | 21.24          | 21.03 | 21.27 | 21.18 | 0.13 |
| CYP1A4   | A02  | 24.05          | 23.59 | 24.05 | 23.90 | 0.27 |
| UGT1A9   | A03  | 24.83          | 24.67 | 24.68 | 24.73 | 0.09 |
| SULT1B1  | A04  | 24.13          | 23.6  | 24.27 | 24.00 | 0.35 |
| BATF3    | A05  | 24.98          | 24.93 | 25.69 | 25.20 | 0.43 |
| PDK4     | A06  | 28.42          | 27.88 | 28.39 | 28.23 | 0.30 |
| TXN      | B01  | 18.01          | 17.68 | 17.8  | 17.83 | 0.17 |
| ACSL5    | B02  | 24.06          | 23.71 | 24.06 | 23.94 | 0.20 |
| SLCO1A2  | B03  | 22.17          | 21.87 | 22.31 | 22.12 | 0.22 |
| TTR      | B04  | 15.73          | 15.37 | 16.03 | 15.71 | 0.33 |
| HMOX1    | B05  | 22.3           | 22.04 | 22.93 | 22.42 | 0.46 |
| THRSP    | B06  | 18.53          | 17.98 | 18.22 | 18.24 | 0.28 |
| IGF1     | C01  | 30.19          | 29.06 | 30.84 | 30.03 | 0.90 |
| SULT1E1  | C02  | 21.67          | 21.22 | 21.77 | 21.55 | 0.29 |
| CYP7B1   | C03  | 25.78          | 25.26 | 25.96 | 25.67 | 0.36 |
| FGF19    | C04  | 24.33          | 24.16 | 24.79 | 24.43 | 0.33 |
| ALAS1    | C05  | 19.61          | 19.24 | 20.19 | 19.68 | 0.48 |
| IL16     | C06  | 27.71          | 27.5  | 27.57 | 27.59 | 0.11 |
| MT4      | D01  | 23.36          | 22.71 | 23.33 | 23.13 | 0.37 |
| SCD      | D02  | 17.32          | 17.16 | 17.58 | 17.35 | 0.21 |
| LBFABP   | D03  | 20.68          | 20.04 | 20.85 | 20.52 | 0.43 |
| CDKN1A   | D04  | 23.28          | 23.06 | 23.37 | 23.24 | 0.16 |
| GADD45A  | D05  | 22.15          | 21.91 | 22.51 | 22.19 | 0.30 |
| MGMT     | D06  | 24.27          | 23.72 | 24.08 | 24.02 | 0.28 |
| NAT2     | E01  | 24.41          | 24.07 | 24.34 | 24.27 | 0.18 |
| ALDH1A1  | E02  | 21.08          | 20.58 | 21.18 | 20.95 | 0.32 |
| MSH2     | E03  | 24.13          | 23.66 | 24.21 | 24.00 | 0.30 |
| CRYAB    | E04  | 31.99          | 31.96 | 32.27 | 32.07 | 0.17 |
| FOXA1    | E05  | 23.42          | 23.26 | 23.87 | 23.52 | 0.32 |
| APOB     | E06  | 19.54          | 19.18 | 19.52 | 19.41 | 0.20 |
| POLB     | F01  | 26.11          | 25.7  | 26.04 | 25.95 | 0.22 |
| POLK     | F02  | 26.39          | 26.02 | 26.59 | 26.33 | 0.29 |
| TP63     | F03  | 29.87          | 29.47 | 29.81 | 29.72 | 0.22 |
| G6PC     | F04  | 20.56          | 20.39 | 20.56 | 20.50 | 0.10 |
| CA3B     | F05  | 29.77          | 28.87 | 30.37 | 29.67 | 0.75 |
| LSS      | F06  | 22.7           | 22.26 | 22.57 | 22.51 | 0.23 |
| AOC1     | G01  | 29.32          | 28.92 | 28.92 | 29.05 | 0.23 |
| MGST3    | G02  | 19.65          | 19.14 | 19.55 | 19.45 | 0.27 |
| LEAP2    | G03  | 21.64          | 21.1  | 21.67 | 21.47 | 0.32 |
| FGA      | G04  | 18.47          | No Ct | 18.74 | 24.07 | 9.47 |
| MAT1A    | G05  | 21.43          | 21.16 | 21.85 | 21.48 | 0.35 |
| IL1B     | G06  | 30.34          | 30.05 | 30.23 | 30.21 | 0.15 |
| NOS2     | H01  | 27.3           | 27.43 | 26.96 | 27.23 | 0.24 |
| EEF1A1   | H02  | 16.93          | 16.44 | 17.18 | 16.85 | 0.38 |
| RPL4     | H03  | 17.76          | 17.14 | 17.87 | 17.59 | 0.39 |
| GGDC     | H04  | 34.93          | 35.63 | 34.45 | 34.79 | 0.30 |
| PPC      | H06  | 19.33          | 19.91 | 19.45 | 19.56 | 0.31 |
| <b>B</b> |      |                |       |       |       |      |
| Symbol   | Well | Test Sample    |       |       | AVG   | SD   |
|          |      | exp1           | exp2  | exp3  |       |      |



|         |     |       |       |       |       |      |
|---------|-----|-------|-------|-------|-------|------|
| CYP3A7  | A01 | 21.32 | 21.26 | 21.25 | 21.28 | 0.04 |
| CYP1A4  | A02 | 23.55 | 23.15 | 23.11 | 23.27 | 0.24 |
| UGT1A9  | A03 | 24.36 | 24.36 | 24.03 | 24.25 | 0.19 |
| SULT1B1 | A04 | 23.55 | 23.17 | 23.09 | 23.27 | 0.25 |
| BATF3   | A05 | 24.99 | 26.27 | 25.19 | 25.48 | 0.69 |
| PDK4    | A06 | 27.85 | 27.47 | 27.69 | 27.67 | 0.19 |
| TXN     | B01 | 17.58 | 17.31 | 17.06 | 17.32 | 0.26 |
| ACSL5   | B02 | 23.34 | 23.29 | 23.35 | 23.33 | 0.03 |
| SLCO1A2 | B03 | 21.75 | 21.79 | 21.63 | 21.72 | 0.08 |
| TTR     | B04 | 15.43 | 15.56 | 15.26 | 15.42 | 0.15 |
| HMOX1   | B05 | 21.53 | 22.39 | 21.39 | 21.77 | 0.54 |
| THRSP   | B06 | 18.63 | 18.39 | 18.51 | 18.51 | 0.12 |
| IGF1    | C01 | 28.76 | 29.11 | 28.94 | 28.94 | 0.18 |
| SULT1E1 | C02 | 21.03 | 20.9  | 20.96 | 20.96 | 0.07 |
| CYP7B1  | C03 | 25.06 | 24.6  | 24.72 | 24.79 | 0.24 |
| FGF19   | C04 | 24.07 | 24.11 | 23.93 | 24.04 | 0.09 |
| ALAS1   | C05 | 18.66 | 19.42 | 18.44 | 18.84 | 0.51 |
| IL16    | C06 | 27.88 | 27.57 | 27.53 | 27.66 | 0.19 |
| MT4     | D01 | 23.44 | 24.8  | 23.24 | 23.83 | 0.85 |
| SCD     | D02 | 17.3  | 17.34 | 17.27 | 17.30 | 0.04 |
| LBFABP  | D03 | 20.26 | 20.4  | 20.29 | 20.32 | 0.07 |
| CDKN1A  | D04 | 23.4  | 23.42 | 23.33 | 23.38 | 0.05 |
| GADD45A | D05 | 21.99 | 22.14 | 21.6  | 21.91 | 0.28 |
| MGMT    | D06 | 24.01 | 23.5  | 23.74 | 23.75 | 0.26 |
| NAT2    | E01 | 23.98 | 24.05 | 23.93 | 23.99 | 0.06 |
| ALDH1A1 | E02 | 20.24 | 20.1  | 20.29 | 20.21 | 0.10 |
| MSH2    | E03 | 23.64 | 23.79 | 23.54 | 23.66 | 0.13 |
| CRYAB   | E04 | 31.97 | 31.53 | 31.55 | 31.68 | 0.25 |
| FOXA1   | E05 | 23.03 | 23.12 | 22.97 | 23.04 | 0.08 |
| APOB    | E06 | 18.91 | 18.53 | 18.85 | 18.76 | 0.20 |
| POLB    | F01 | 25.19 | 25.46 | 25.36 | 25.34 | 0.14 |
| POLK    | F02 | 26.05 | 25.44 | 25.46 | 25.65 | 0.35 |
| TP63    | F03 | 30.09 | 29.93 | 30.23 | 30.08 | 0.15 |
| G6PC    | F04 | 20.46 | 20.87 | 20.55 | 20.63 | 0.22 |
| CA3B    | F05 | 28.98 | 29.49 | 29.9  | 29.46 | 0.46 |
| LSS     | F06 | 22.53 | 22.25 | 22.43 | 22.40 | 0.14 |
| AOC1    | G01 | 29.07 | 28.81 | 28.61 | 28.83 | 0.23 |
| MGST3   | G02 | 19.08 | 18.96 | 18.96 | 19.00 | 0.07 |
| LEAP2   | G03 | 21.61 | 21.46 | 21.21 | 21.43 | 0.20 |
| FGA     | G04 | 18.3  | 18.61 | 18    | 18.30 | 0.31 |
| MAT1A   | G05 | 21.06 | 21.08 | 21.06 | 21.07 | 0.01 |
| IL1B    | G06 | 29.8  | 29.68 | 29.66 | 29.71 | 0.08 |
| NOS2    | H01 | 26.92 | 26.94 | 26.65 | 26.84 | 0.16 |
| EEF1A1  | H02 | 16.48 | 16.27 | 16.48 | 16.41 | 0.12 |
| RPL4    | H03 | 17.61 | 17.7  | 17.47 | 17.59 | 0.12 |
| GGDC    | H04 | No Ct | No Ct | No Ct | 35.00 | 0.00 |
| PPC     | H06 | 19.63 | 18.9  | 18.72 | 19.08 | 0.48 |

**Table S8.** Fold changes calculated from the Chicken ToxChip PCR array. Target genes were considered significantly dysregulated if FDR adjusted t-test p-value < 0.05 and 0.5 < fold change > 2 (indicated in orange).

| Genes   | DMSO | Toronto,<br>Canada | New<br>York,<br>USA | Sydney,<br>Australia | Istanbul,<br>Turkey | London,<br>UK | Kolkata,<br>India | Beijing,<br>China | Bangkok,<br>Thailand | Mexico<br>City,<br>Mexico | Santiago,<br>Chile | Buenos<br>Aires,<br>Argentina | Lagos,<br>Nigeria | Cairo,<br>Egypt |
|---------|------|--------------------|---------------------|----------------------|---------------------|---------------|-------------------|-------------------|----------------------|---------------------------|--------------------|-------------------------------|-------------------|-----------------|
| ACSL5   | 0.00 | -1.74              | -0.39               | -0.71                | 0.28                | -0.68         | 0.26              | -0.49             | 0.68                 | -0.81                     | -0.20              | -0.04                         | -0.15             | -0.46           |
| ALAS1   | 0.00 | 1.24               | 0.64                | 0.97                 | 1.55                | 1.35          | 1.56              | 1.67              | 0.49                 | 1.75                      | 1.23               | 0.53                          | 1.87              | 1.62            |
| ALDH1A1 | 0.00 | -0.39              | 0.23                | 0.35                 | 0.60                | 0.27          | 1.07              | 0.65              | 0.58                 | 0.42                      | 0.83               | 0.35                          | 1.06              | 0.65            |
| AOC1    | 0.00 | -1.15              | -0.28               | -0.90                | -0.14               | -0.37         | -0.72             | -1.56             | 0.51                 | -1.25                     | -0.94              | -0.35                         | -1.04             | -1.37           |
| APOB    | 0.00 | -2.43              | -0.73               | -0.97                | -0.24               | -1.22         | -1.11             | -1.67             | 0.93                 | -1.73                     | -1.27              | -1.00                         | -1.31             | -1.32           |
| BATF3   | 0.00 | -0.46              | 0.05                | 0.24                 | -0.62               | -0.02         | 0.18              | -0.03             | -0.61                | -0.16                     | 0.12               | 0.43                          | -0.11             | -0.18           |
| CA3B    | 0.00 | -0.93              | -0.13               | -0.24                | -0.75               | -0.75         | -0.77             | -2.21             | -0.07                | -1.38                     | -0.44              | -0.15                         | -0.87             | -1.03           |
| CDKN1A  | 0.00 | -0.84              | -0.53               | -0.61                | -0.99               | -0.69         | -0.77             | -0.71             | -0.40                | -0.49                     | -0.54              | -0.67                         | -0.70             | -0.88           |
| CRYAB   | 0.00 | -0.37              | 0.70                | -1.00                | 0.52                | 0.63          | -0.04             | -0.49             | 0.53                 | -0.85                     | -1.31              | -0.56                         | -1.50             | -1.09           |
| CYP1A4  | 0.00 | 1.64               | 1.71                | 1.86                 | -0.01               | 1.56          | 2.66              | 1.61              | 0.69                 | 1.97                      | 1.59               | 1.29                          | 4.44              | 1.43            |
| CYP3A7  | 0.00 | -1.50              | -1.03               | -0.67                | -0.89               | -0.73         | -0.99             | -1.58             | -0.12                | -1.41                     | -0.59              | -0.32                         | -0.75             | -1.36           |
| CYP7B1  | 0.00 | -2.81              | -0.10               | -0.55                | -0.78               | -1.08         | 0.00              | -1.01             | 0.78                 | -1.49                     | -0.22              | -0.33                         | -0.59             | -0.88           |
| FGA     | 0.00 | -4.48              | -0.65               | -1.15                | -0.39               | -2.09         | -0.55             | -2.09             | 1.13                 | -2.62                     | -0.47              | 0.62                          | -1.44             | -1.77           |
| FGF19   | 0.00 | 2.45               | -0.27               | 0.27                 | 1.70                | 1.39          | 0.60              | 2.06              | -0.02                | 1.61                      | 0.20               | -0.95                         | -0.26             | 1.59            |
| FOXA1   | 0.00 | -1.68              | -0.55               | -0.82                | 0.21                | -0.96         | -0.60             | -1.11             | 0.66                 | -0.81                     | -0.75              | -0.73                         | -0.91             | -1.29           |
| G6PC    | 0.00 | -3.52              | -1.29               | -1.71                | -0.25               | -1.99         | -1.03             | -1.39             | 0.13                 | -1.86                     | -1.59              | -1.29                         | -1.59             | -2.04           |
| GADD45A | 0.00 | -0.21              | -0.31               | -0.33                | 0.50                | -0.07         | 0.11              | 0.08              | 0.15                 | 0.03                      | 0.02               | -0.09                         | -0.06             | 0.01            |
| HMOX1   | 0.00 | 0.72               | 0.92                | 0.99                 | 0.37                | 1.18          | 1.46              | 1.62              | 0.19                 | 1.61                      | 1.19               | 0.72                          | 1.73              | 1.65            |
| IGF1    | 0.00 | -2.40              | 0.37                | 0.32                 | -0.87               | -1.96         | -0.42             | -1.50             | 0.91                 | -2.14                     | 0.65               | 0.86                          | -1.12             | -1.19           |
| IL16    | 0.00 | -0.84              | -1.16               | -1.60                | -0.61               | -1.63         | -1.39             | -1.81             | 0.04                 | -1.54                     | -1.82              | -1.26                         | -1.67             | -1.58           |
| IL1B    | 0.00 | -0.06              | -0.04               | -0.02                | -0.08               | -0.53         | -1.71             | -0.89             | 0.27                 | -0.94                     | -0.72              | -1.35                         | -0.75             | -1.18           |
| LBFABP  | 0.00 | -1.95              | -0.03               | 0.04                 | -0.33               | -0.86         | -0.19             | -0.68             | 0.04                 | -1.15                     | -0.12              | 0.24                          | -0.76             | -1.20           |
| LEAP2   | 0.00 | -2.87              | -0.69               | -0.87                | -0.19               | -1.07         | -0.03             | -0.60             | 0.20                 | -1.21                     | -0.56              | -0.62                         | -0.78             | -1.13           |
| LSS     | 0.00 | -2.45              | -1.22               | -1.32                | -1.03               | -1.71         | -1.33             | -1.86             | 0.27                 | -1.67                     | -1.09              | -0.61                         | -1.46             | -1.59           |
| MAT1A   | 0.00 | -1.23              | -0.42               | -0.60                | -0.39               | -0.94         | -0.30             | -0.96             | 0.37                 | -0.71                     | -0.13              | 0.30                          | -0.52             | -0.71           |
| MGMT    | 0.00 | -0.21              | 0.12                | 0.10                 | -0.20               | 0.09          | -0.04             | 0.00              | 0.07                 | 0.00                      | 0.08               | 0.08                          | 0.04              | -0.07           |
| MGST3   | 0.00 | 0.25               | 0.20                | 0.49                 | 0.90                | 0.47          | 0.69              | 0.76              | 0.24                 | 0.81                      | 0.67               | 0.14                          | 0.68              | 0.59            |
| MSH2    | 0.00 | -0.23              | -0.20               | -0.26                | -0.02               | -0.29         | 0.02              | -0.13             | 0.17                 | -0.03                     | -0.04              | 0.09                          | -0.01             | -0.04           |
| MT4     | 0.00 | -0.19              | 0.44                | 0.34                 | -0.64               | 0.18          | -0.24             | -0.38             | -1.03                | 0.12                      | -0.65              | 0.32                          | -0.73             | -0.46           |
| NAT2    | 0.00 | -1.05              | -0.32               | -0.31                | 0.47                | -0.26         | -0.64             | -0.17             | 0.27                 | -0.38                     | -0.15              | -0.37                         | -0.13             | -0.32           |
| NOS2    | 0.00 | -0.21              | -0.28               | -0.12                | -0.41               | -0.33         | -0.22             | -0.42             | -0.06                | -0.36                     | -0.28              | -0.02                         | -0.26             | -0.33           |
| PDK4    | 0.00 | 1.85               | -0.09               | 0.08                 | 1.19                | 1.20          | 1.37              | 1.58              | 0.65                 | 1.26                      | 0.73               | -0.50                         | 1.26              | 1.74            |
| POLB    | 0.00 | -0.32              | -0.67               | -0.58                | 0.51                | -0.59         | -0.87             | -0.71             | 0.65                 | -0.51                     | -0.99              | -0.95                         | -0.81             | -0.70           |
| POLK    | 0.00 | -0.65              | -0.22               | -0.31                | 0.09                | -0.31         | -0.16             | -0.32             | 0.63                 | -0.09                     | -0.08              | -0.10                         | -0.22             | -0.16           |
| SCD     | 0.00 | -2.83              | -1.20               | -1.69                | -1.00               | -2.01         | -1.69             | -2.76             | 0.39                 | -2.34                     | -1.47              | -1.08                         | -1.88             | -2.42           |
| SLCO1A2 | 0.00 | -2.32              | -0.16               | -0.40                | -0.14               | -0.69         | -0.04             | -1.01             | 0.45                 | -1.28                     | -0.06              | 0.27                          | -0.52             | -1.03           |

|         |      |       |       |       |       |       |       |       |       |       |       |       |       |       |
|---------|------|-------|-------|-------|-------|-------|-------|-------|-------|-------|-------|-------|-------|-------|
| SULT1B1 | 0.00 | 0.91  | 0.63  | 0.49  | 0.36  | 0.94  | 0.85  | 0.56  | 0.43  | 0.51  | 0.60  | 0.43  | 0.61  | 0.51  |
| SULT1E1 | 0.00 | 0.84  | 0.34  | 0.51  | 1.13  | 0.87  | 1.29  | 1.52  | 0.47  | 1.40  | 1.03  | 0.25  | 1.26  | 1.19  |
| THRSP   | 0.00 | -3.89 | -1.25 | -1.99 | -1.71 | -2.79 | -1.44 | -2.53 | -0.34 | -2.79 | -1.83 | -0.96 | -2.38 | -2.71 |
| TP63    | 0.00 | -1.47 | -1.52 | -1.36 | -0.52 | -1.65 | -1.43 | -1.81 | -0.34 | -1.71 | -2.24 | -1.38 | -1.89 | -1.12 |
| TTR     | 0.00 | -1.98 | -0.08 | -0.41 | -0.42 | -0.68 | -0.05 | -0.45 | 0.15  | -0.67 | 0.04  | 0.29  | -0.28 | -0.67 |
| TXN     | 0.00 | 1.45  | 0.22  | 0.69  | 1.34  | 1.08  | 1.33  | 1.89  | 0.27  | 1.69  | 1.03  | 0.28  | 1.16  | 1.42  |
| UGT1A9  | 0.00 | -1.55 | -1.90 | -2.02 | 0.52  | -2.17 | -1.63 | -1.33 | 0.49  | -1.33 | -2.24 | -2.25 | -1.87 | -1.66 |

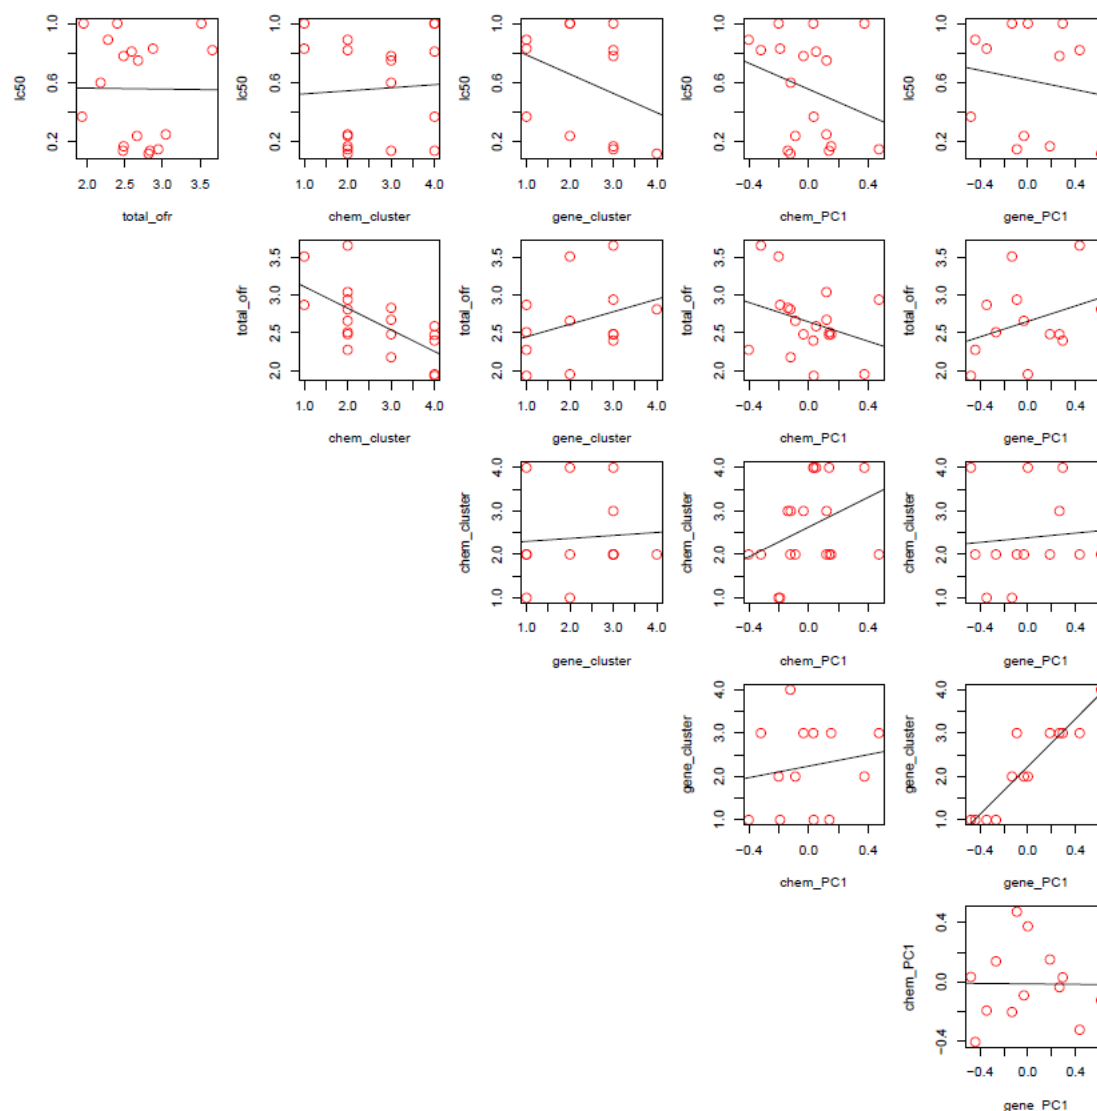

**Figure S1.** Simple linear regression plots between each of the OFR concentrations, the LC50 values, heatmap clusters and principle component one (PC1) values from chemical burdens and gene expression (detailed in Table 1).

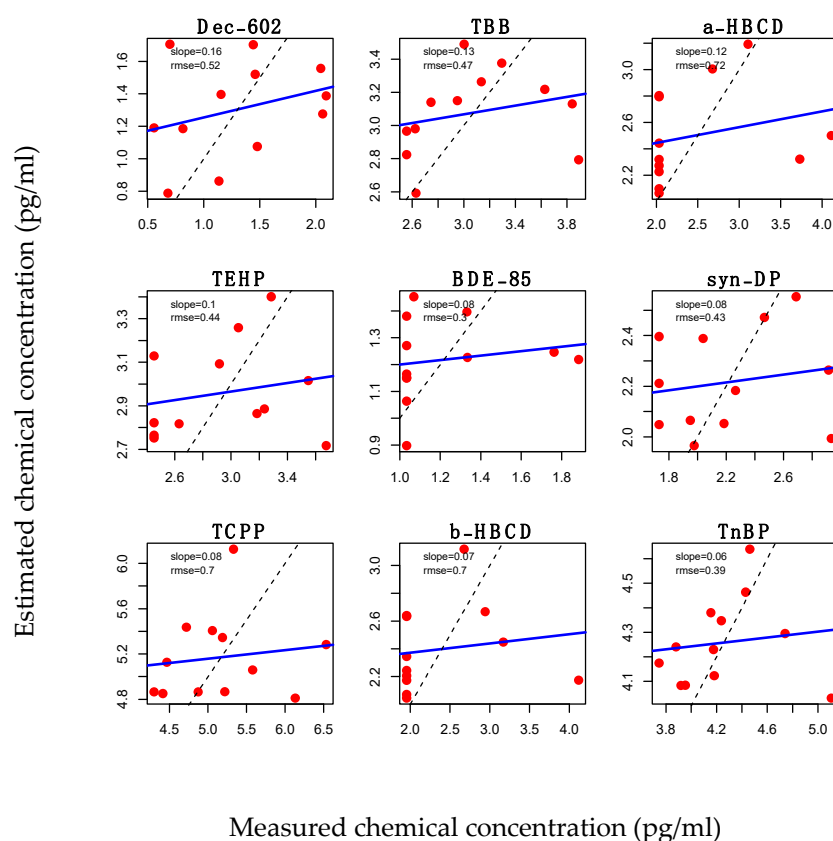

**Figure S2.** Linear regression plots comparing measured and estimated concentrations of the top nine performing OFRs identified by twelve megacities-based PLS analysis using the gene expression data. 7 of 19 cities were removed: three cities [Tokyo, New Delhi, and Warsaw] failed for RNA extraction, three cities [Sao Paulo, Bogota and Madrid] had unstable expression of housekeeping gene and one outlier [Lagos] had an unusual OFR to bioactivity relationship. The blue line indicates the regression between estimated and actual LC50 values. The dashed line represents a perfect 1-to-1 prediction. Red dots represent air samples collected megacities.

## References

1. Saini, A.; Harner, T.; Chinnadhurai, S.; Schuster, J.K.; Yates, A.; Sweetman, A.; Aristizabal-Zuluaga, B.H.; Jiménez, B.; Manzano, C.A.Gaga, E.O. *GAPS-megacities: A new global platform for investigating persistent organic pollutants and chemicals of emerging concern in urban air*. *Environmental Pollution*, 2020. **267**; p. 115416.
